# Supplementary material
Source: HighWire-hosted journal article supplement (https://www.rcpjournals.org/highwire/filestream/14075/field_highwire_adjunct_files/0/Farrugia_supplementary_material_S1.pdf)
Supplement: Farrugia_supplementary_material_S1.pdf [file Farrugia_supplementary_material_S1.pdf]

**Supplemental Table S1: Correlation Table showing Spearman's correlation coefficient between plasma glucose on admission, age, length of stay and different biochemical variables**

|                   |        | Age              | Length of Stay   | Plasma Urea      | Plasma Creatinine | Plasma Sodium    | Plasma Potassium | Plasma Chloride  | eGFR             | Serum Osmolality |
|-------------------|--------|------------------|------------------|------------------|-------------------|------------------|------------------|------------------|------------------|------------------|
| PG on admission   | $\rho$ | <b>0.198</b>     | <b>0.087</b>     | <b>0.209</b>     | <b>0.129</b>      | <b>-0.183</b>    | <b>0.086</b>     | <b>-0.285</b>    | <b>-0.140</b>    | <b>0.249</b>     |
|                   | $P$    | <b>&lt;0.001</b> | <b>0.017</b>     | <b>&lt;0.001</b> | <b>&lt;0.001</b>  | <b>&lt;0.001</b> | <b>0.023</b>     | <b>&lt;0.001</b> | <b>&lt;0.001</b> | <b>&lt;0.001</b> |
| Age               | $\rho$ |                  | <b>0.245</b>     | <b>0.531</b>     | <b>0.307</b>      | <b>-0.068</b>    | <b>0.110</b>     | <b>-0.138</b>    | <b>-0.486</b>    | <b>0.196</b>     |
|                   | $P$    |                  | <b>&lt;0.001</b> | <b>&lt;0.001</b> | <b>&lt;0.001</b>  | <b>0.022</b>     | <b>&lt;0.001</b> | <b>&lt;0.001</b> | <b>&lt;0.001</b> | <b>&lt;0.001</b> |
| Length of Stay    | $\rho$ |                  |                  | <b>0.225</b>     | <b>0.169</b>      | <b>-0.136</b>    | 0.025            | <b>-0.193</b>    | <b>-0.204</b>    | 0.050            |
|                   | $P$    |                  |                  | <b>&lt;0.001</b> | <b>&lt;0.001</b>  | <b>&lt;0.001</b> | 0.425            | <b>&lt;0.001</b> | <b>&lt;0.001</b> | 0.167            |
| Plasma Urea       | $\rho$ |                  |                  |                  | <b>0.676</b>      | -0.007           | <b>0.256</b>     | -0.037           | <b>-0.752</b>    | <b>0.515</b>     |
|                   | $P$    |                  |                  |                  | <b>&lt;0.001</b>  | 0.808            | <b>&lt;0.001</b> | 0.214            | <b>&lt;0.001</b> | <b>&lt;0.001</b> |
| Plasma Creatinine | $\rho$ |                  |                  |                  |                   | 0.007            | <b>0.198</b>     | 0.009            | <b>-0.888</b>    | <b>0.389</b>     |
|                   | $P$    |                  |                  |                  |                   | 0.809            | <b>&lt;0.001</b> | 0.771            | <b>&lt;0.001</b> | <b>&lt;0.001</b> |
| Plasma Sodium     | $\rho$ |                  |                  |                  |                   |                  | <b>-0.081</b>    | <b>0.650</b>     | -0.003           | <b>0.615</b>     |
|                   | $P$    |                  |                  |                  |                   |                  | <b>0.010</b>     | <b>&lt;0.001</b> | 0.925            | <b>&lt;0.001</b> |
| Plasma Potassium  | $\rho$ |                  |                  |                  |                   |                  |                  | <b>0.088</b>     | <b>-0.200</b>    | <b>0.216</b>     |
|                   | $P$    |                  |                  |                  |                   |                  |                  | <b>0.005</b>     | <b>&lt;0.001</b> | <b>&lt;0.001</b> |
| Plasma Chloride   | $\rho$ |                  |                  |                  |                   |                  |                  |                  | 0.006            | <b>0.347</b>     |
|                   | $P$    |                  |                  |                  |                   |                  |                  |                  | 0.848            | <b>&lt;0.001</b> |
| eGFR              | $\rho$ |                  |                  |                  |                   |                  |                  |                  |                  | <b>-0.407</b>    |
|                   | $P$    |                  |                  |                  |                   |                  |                  |                  |                  | <b>&lt;0.001</b> |

**Bold indicates statistically significant correlations. eGFR = estimated glomerular filtration rate; PG = plasma glucose.**
